# Supplementary material
Source: PubMed Central journal article supplement (PMC4230498)

Fig S8

A

*Pdx-1-Cre;Smad4<sup>F/F</sup>;Trp53<sup>F/F</sup>;Cdh1<sup>F/+</sup>*  
versus *Pdx-1-Cre;Trp53<sup>F/F</sup>;Cdh1<sup>F/F</sup>*

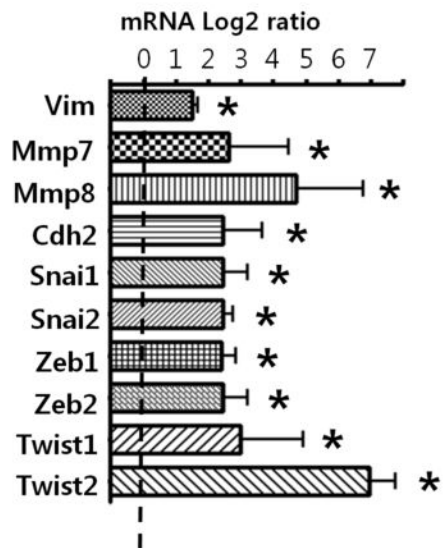

B

Vimentin

Smad4

Gapdh

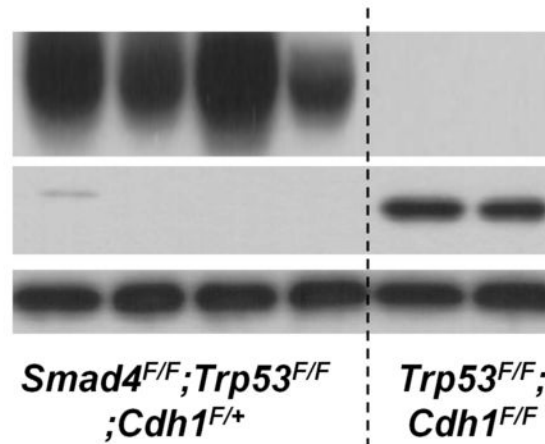

Supplement: NIHMS640277-supplement-S_Fig_8.pdf [file NIHMS640277-supplement-S_Fig_8.pdf]
