# Supplementary material
Source: PubMed Central journal article supplement (PMC4230498)

Fig S1

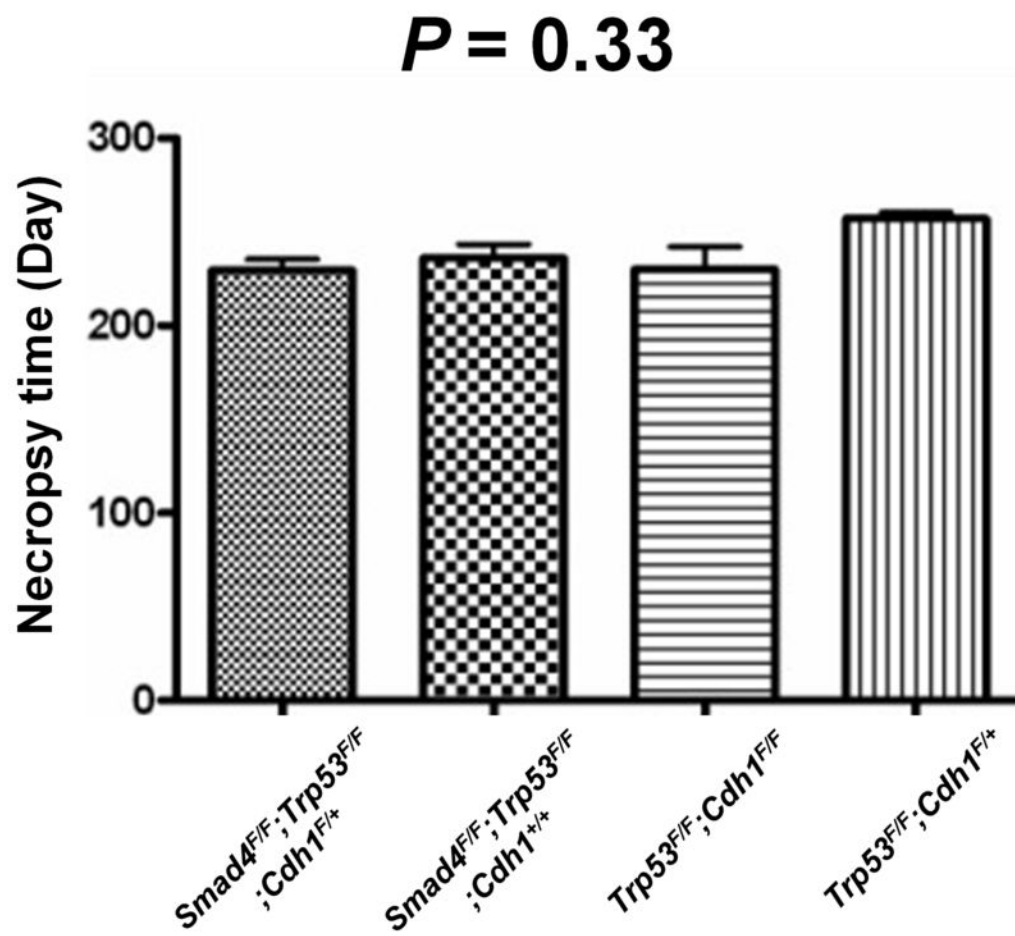

Supplement: NIHMS640277-supplement-S_Fig_1.pdf [file NIHMS640277-supplement-S_Fig_1.pdf]

Fig S10

**A**

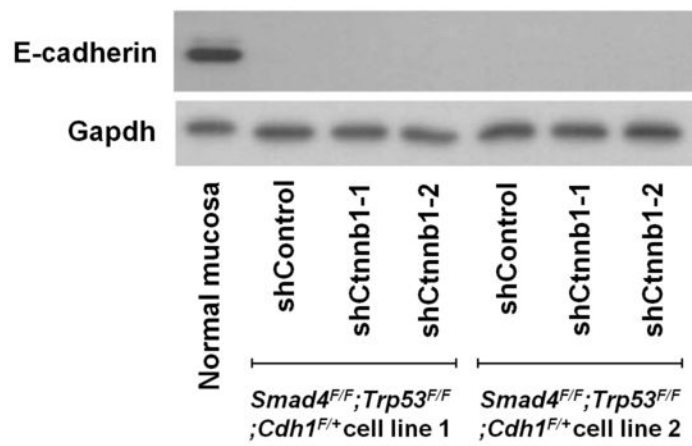

**B**

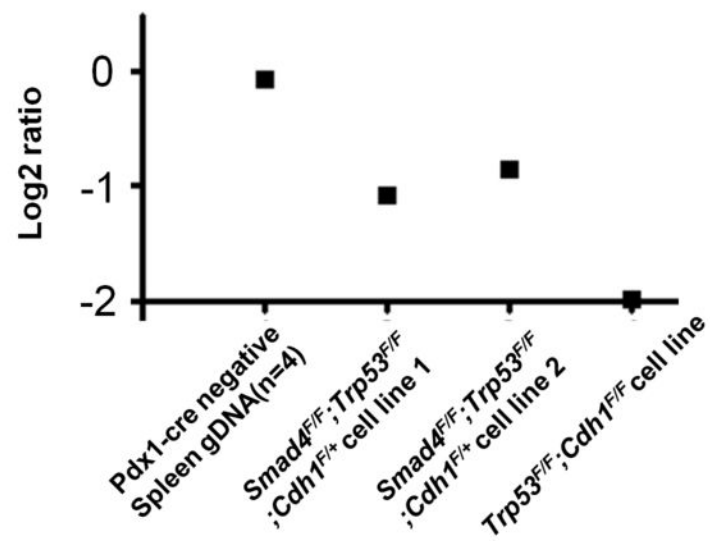

Supplement: NIHMS640277-supplement-S_Fig_10.pdf [file NIHMS640277-supplement-S_Fig_10.pdf]

Fig S2

Smad4

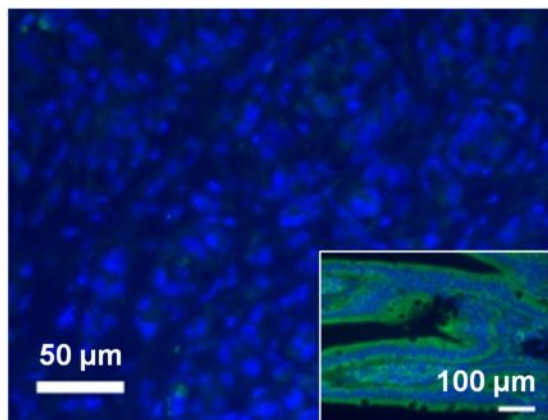

p53

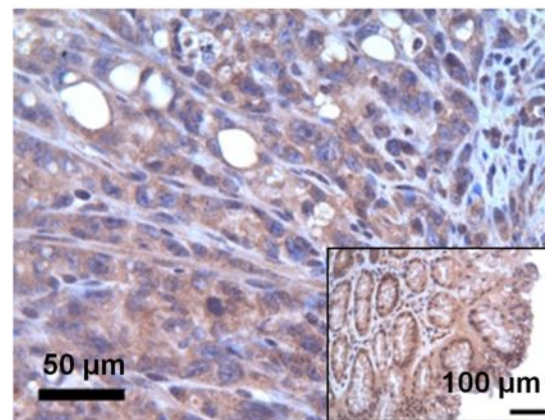

Supplement: NIHMS640277-supplement-S_Fig_2.pdf [file NIHMS640277-supplement-S_Fig_2.pdf]

**Fig S3**

**Mucin 6**

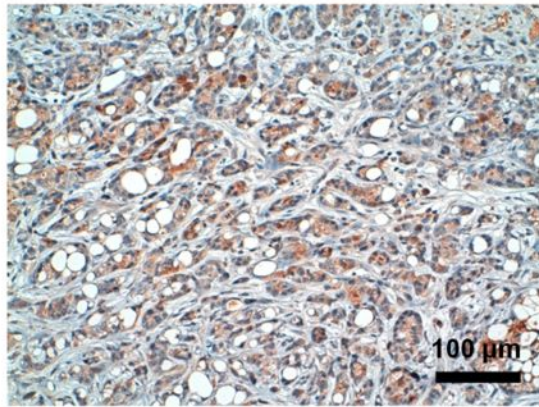

**Tff2**

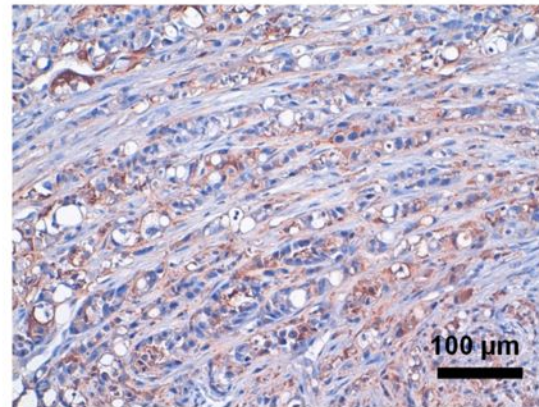

**Mucin 5ac**

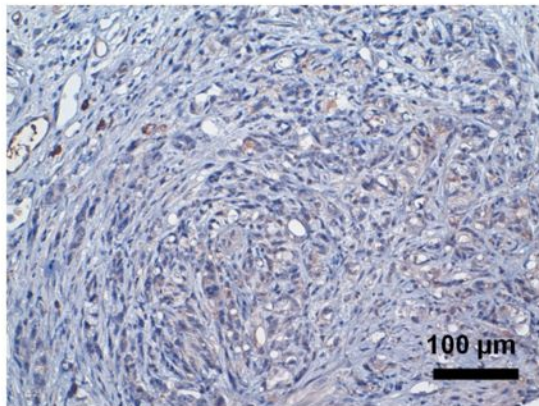

**Somatostatin**

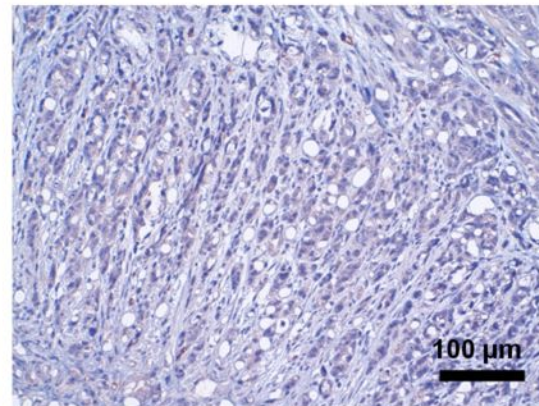

Supplement: NIHMS640277-supplement-S_Fig_3.pdf [file NIHMS640277-supplement-S_Fig_3.pdf]

Fig S4

A

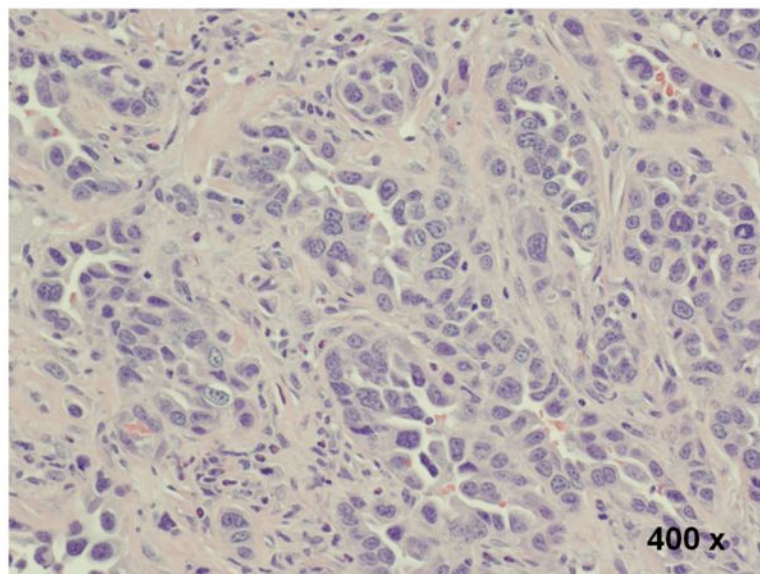

B

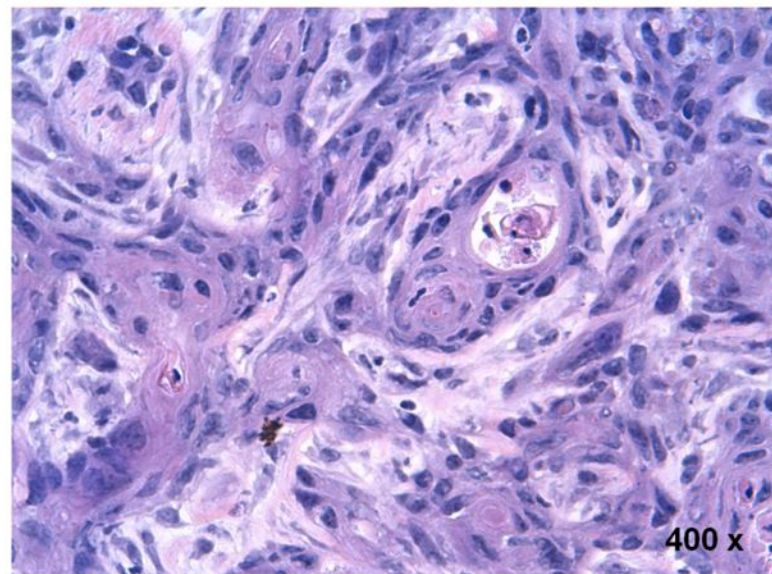

Supplement: NIHMS640277-supplement-S_Fig_4.pdf [file NIHMS640277-supplement-S_Fig_4.pdf]

**Fig S5**

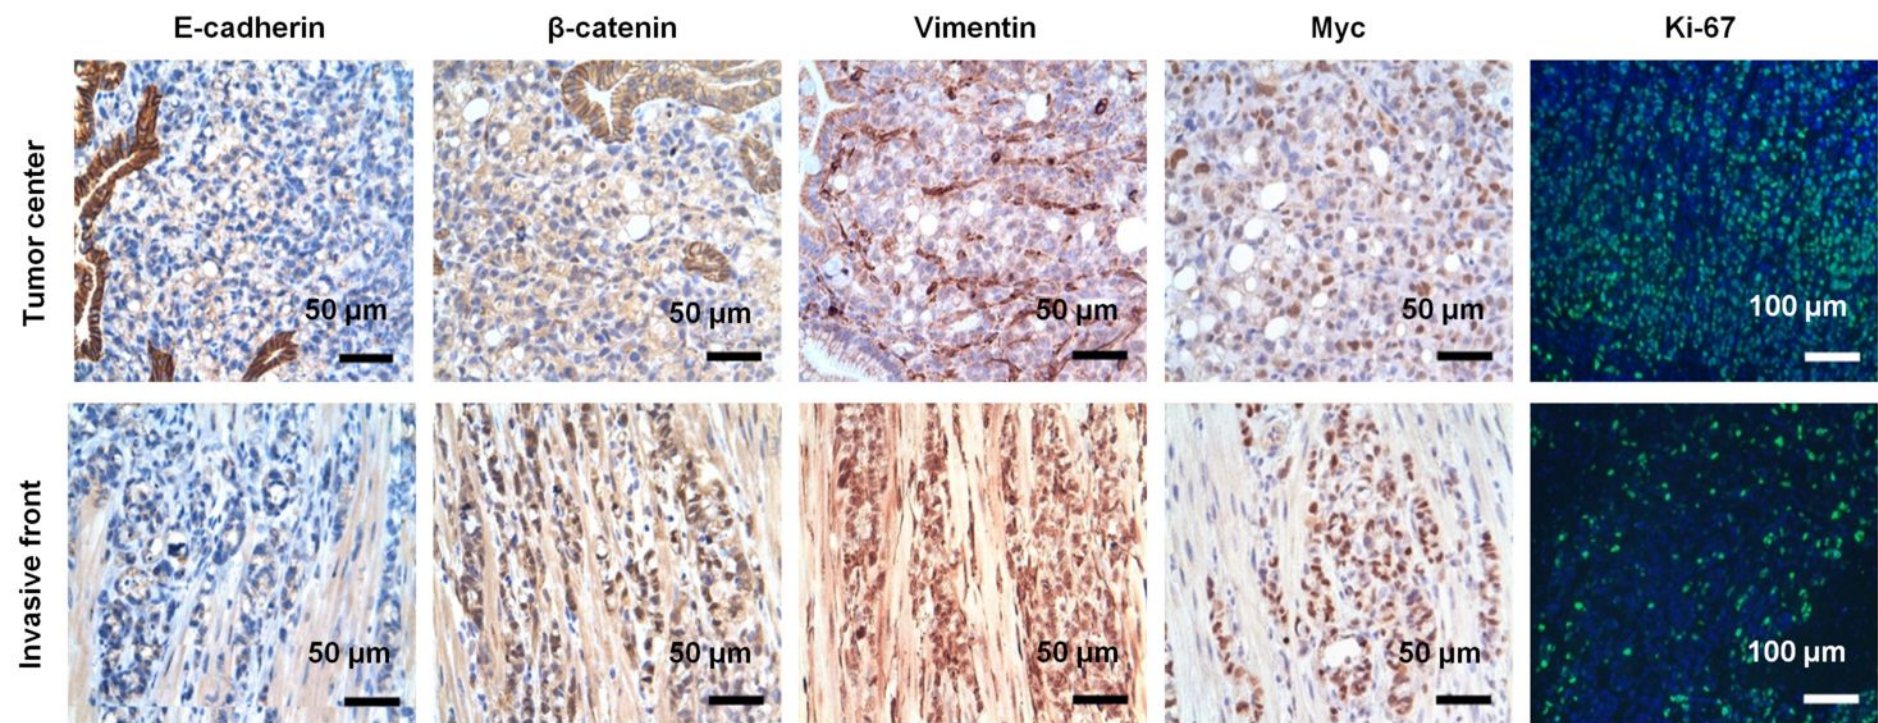

Supplement: NIHMS640277-supplement-S_Fig_5.pdf [file NIHMS640277-supplement-S_Fig_5.pdf]

Fig S6

A

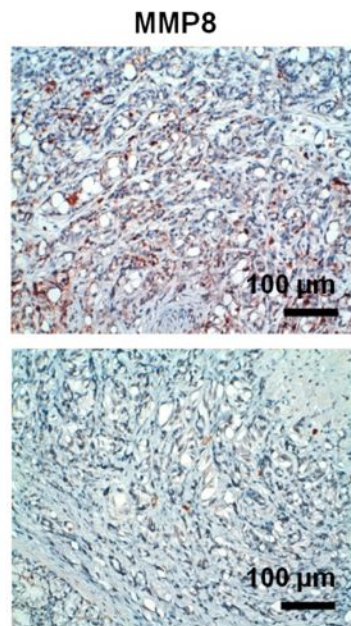

B

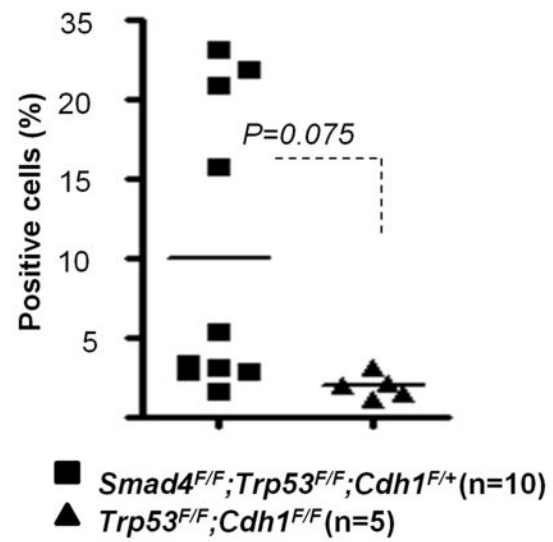

Supplement: NIHMS640277-supplement-S_Fig_6.pdf [file NIHMS640277-supplement-S_Fig_6.pdf]

**Fig S7**

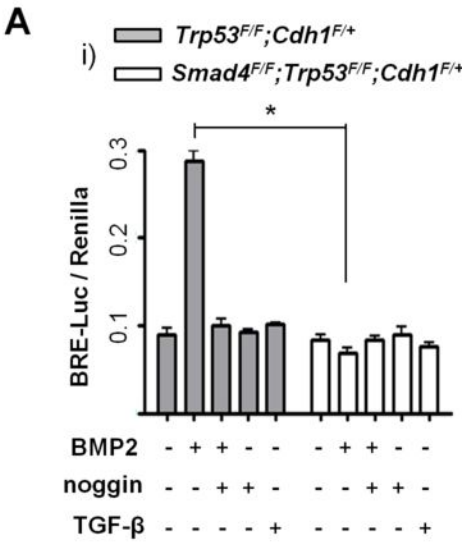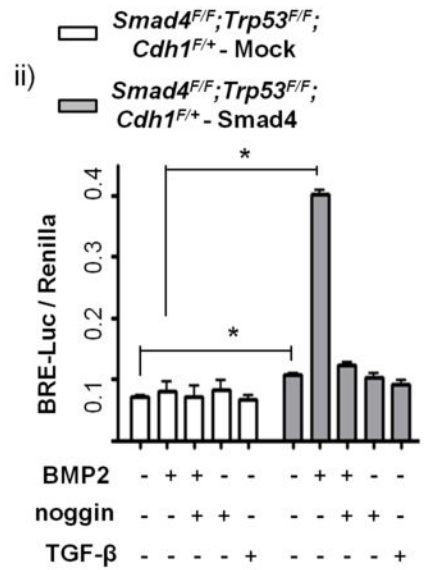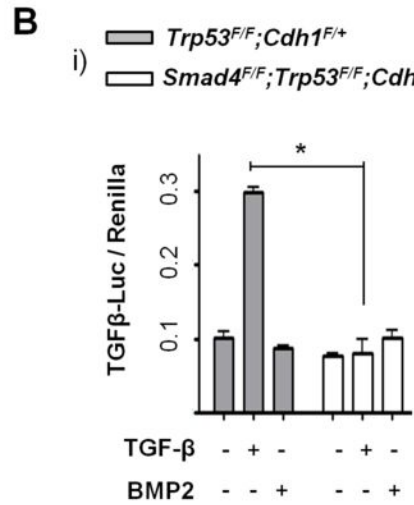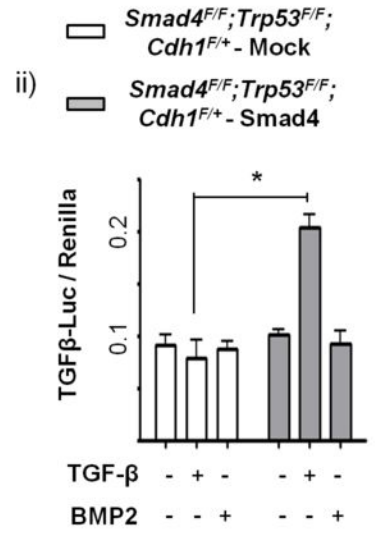

Supplement: NIHMS640277-supplement-S_Fig_7.pdf [file NIHMS640277-supplement-S_Fig_7.pdf]

Fig S9

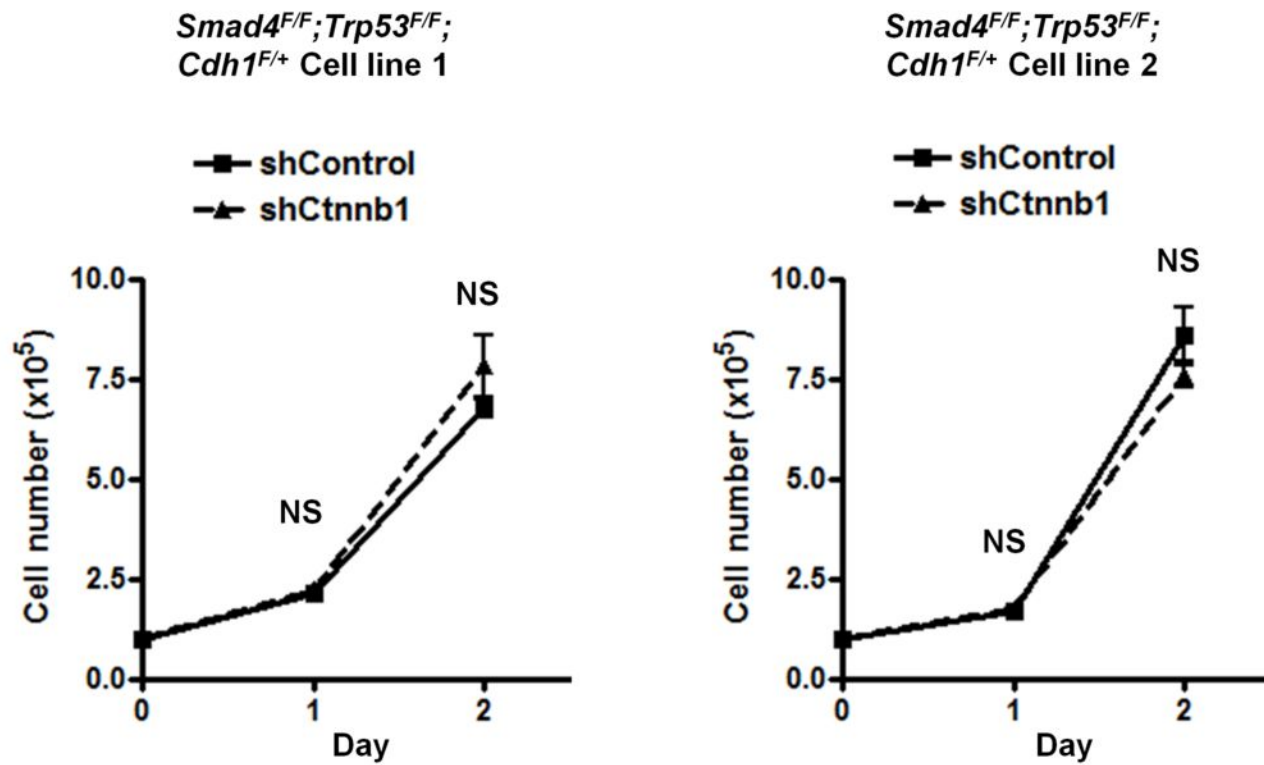

Supplement: NIHMS640277-supplement-S_Fig_9.pdf [file NIHMS640277-supplement-S_Fig_9.pdf]
